# Supplementary material
Source: publisher site journal article supplement (https://www.dovepress.com/article/374318)
Supplement: Supplementary file 1 [file get_supplementary_file.php]

**Supplementary Table 1: Primer sequences for RT-PCR**

| Primers of Real-time PCR |         |                         |
|--------------------------|---------|-------------------------|
| Name                     |         |                         |
| mus-IL-8                 | Forward | TTGCCAAGGAGTGCTAAAGAA   |
|                          | Reverse | GCCCTCTTCAAAAACCTCTCC   |
| mus-IL-1 $\beta$         | Forward | CCTCGTGCTTCGGACCCATA    |
|                          | Reverse | CAGGCTTGTGCTCTGCTTGTGA  |
| mus-IL-6                 | Forward | CTTCTGGGACTGATGCTGGT    |
|                          | Reverse | CTCTGTGAAGTCTCCTCTCCG   |
| mus-IFN- $\beta$ 1       | Forward | AGCTCCAAGAAAGGACGAACA   |
|                          | Reverse | GCCCTGTAGGTGAGGTTGAT    |
| mus-IFN- $\beta$ 1       | Forward | CTCACCTACAGGGCGGACT     |
|                          | Reverse | GGCAAAGGCAGTGTAACCTTT   |
| mus- GAPDH               | Forward | TGGGTGGCAGTGATGGCA      |
|                          | Reverse | GGAGAAGGCTGGGGCTCAT     |
| homo                     |         |                         |
| homo-IL-8                | Forward | CTCTGTGTGAAGGTGCAGTTTT  |
|                          | Reverse | GTTTTCCTTGGGGTCCAGACA   |
| homo-IL-1 $\beta$        | Forward | CAACAAGTGGTGTCTCCATGTC  |
|                          | Reverse | CAACAAGTGGTGTCTCCATGTC  |
| homo-IL-6                | Forward | CAATGAGGAGACTGCCTGGT    |
|                          | Reverse | GCAGGAACTGGATCAGGACT    |
| homo-IFN- $\beta$ 1      | Forward | ATGACCAACAAGTGTCTCCTCC  |
|                          | Reverse | GGAATCCAAGCAAGTTGTAGCTC |
| homo- GAPDH              | Forward | GGAGCGAGATCCCTCCAAAAT   |
|                          | Reverse | GGCTGTTGTCATACTTCTCATGG |
